# Supplementary material for: The solvothermal synthesis and characterization of quaternary arsenic chalcogenides CsTMAsQ3 (TM = Hg, Cd; Q = S, Se) using Cs+ as a structure directing agent: from 1D anionic chains to 2D anionic layers
Source: Royal Society of Chemistry journal article supplement (doi:10.1039/d0ra05058j), 2020-01-01
Supplement: d0ra05058j1.pdf [file d0ra05058j1.pdf]

## Supporting Information

### Content:

**Figure S1.** one-dimensional chains structure of compound  $\text{CsHgAsSe}_3(1)$ .

**Figure S2.** 2-D layer structure of compound  $\text{CsCdAsSe}_3(2)$  .

**Figure S3.** Powder X-ray Diffraction (PXRD) 1 -4 .

**Figure S4.** Thermogravimetric And Differential Scanning Calorimeter Analyses (TG-DSC).

**Table S1.** Summary of Crystal Data for Compounds 1–4.

**Table S2.** Selected bond lengths [ $\text{\AA}$ ] and angles [ $^\circ$ ] for 1.

**Table S3.** Selected bond lengths [ $\text{\AA}$ ] and angles [ $^\circ$ ] for 2.

**Table S4.** Selected bond lengths [ $\text{\AA}$ ] and angles [ $^\circ$ ] for 3.

**Table S5.** Selected bond lengths [ $\text{\AA}$ ] and angles [ $^\circ$ ] for 4.

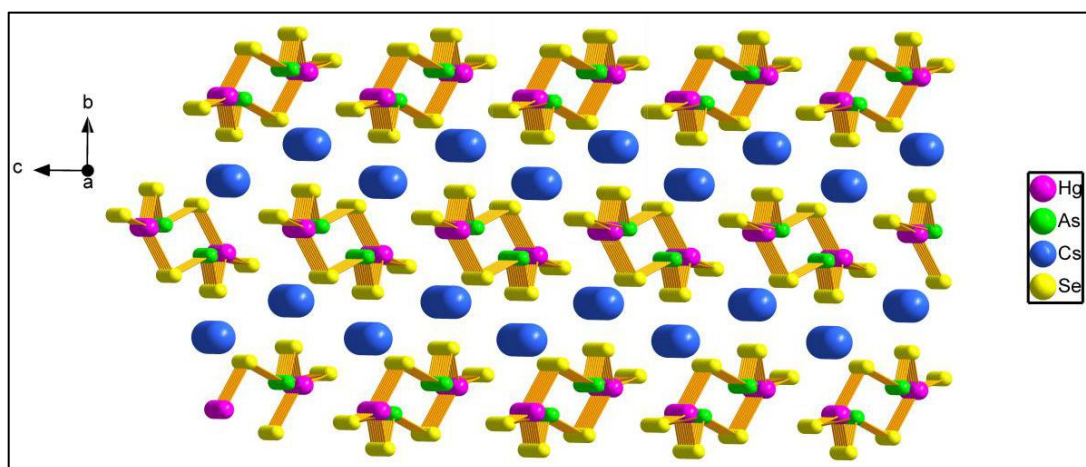

**FigS1.** one-dimensional chains structure of compound 1

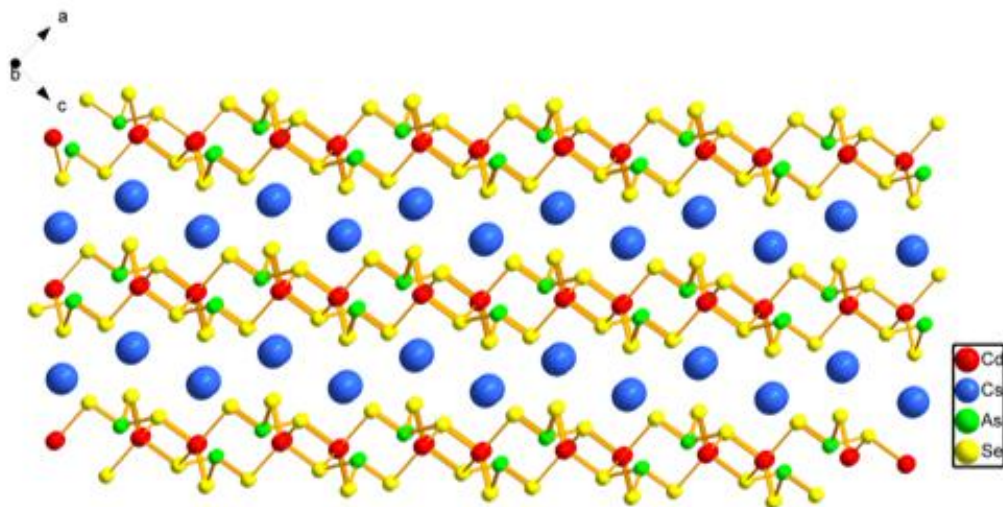

Fig S2. 2-D layer structure of compound CsCdAsSe<sub>3</sub>(2) .

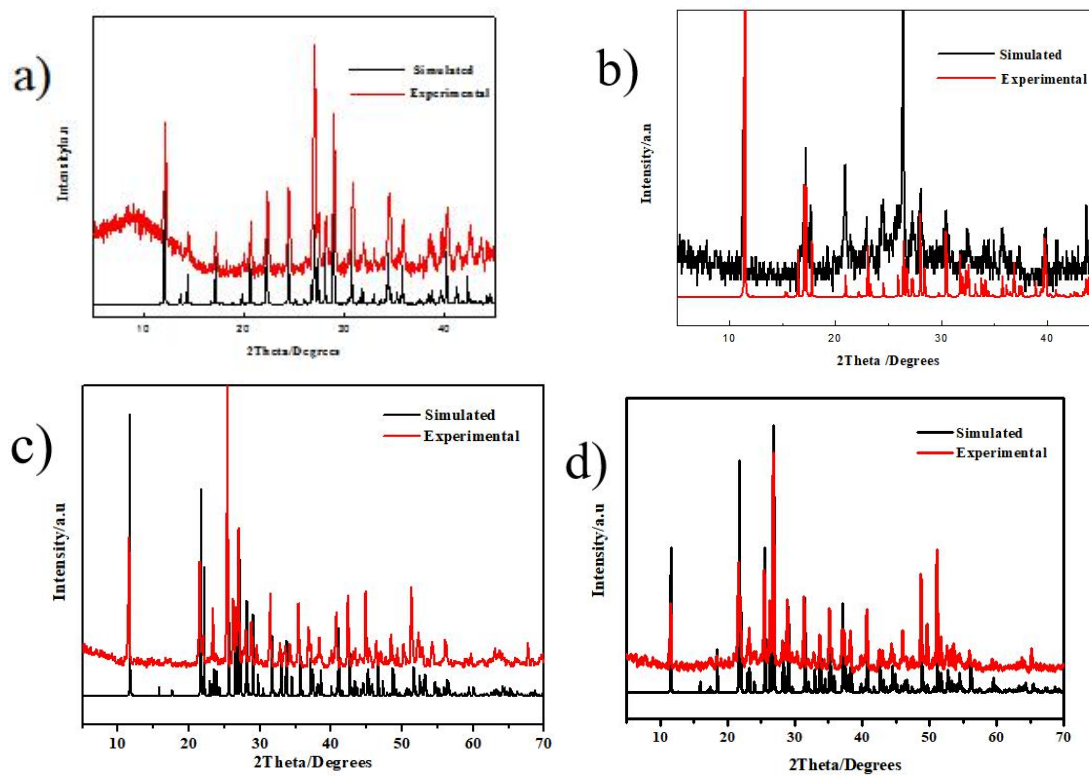

Figure S3. Powder X-ray Diffraction (PXRD) 1 -4 (a-d) .

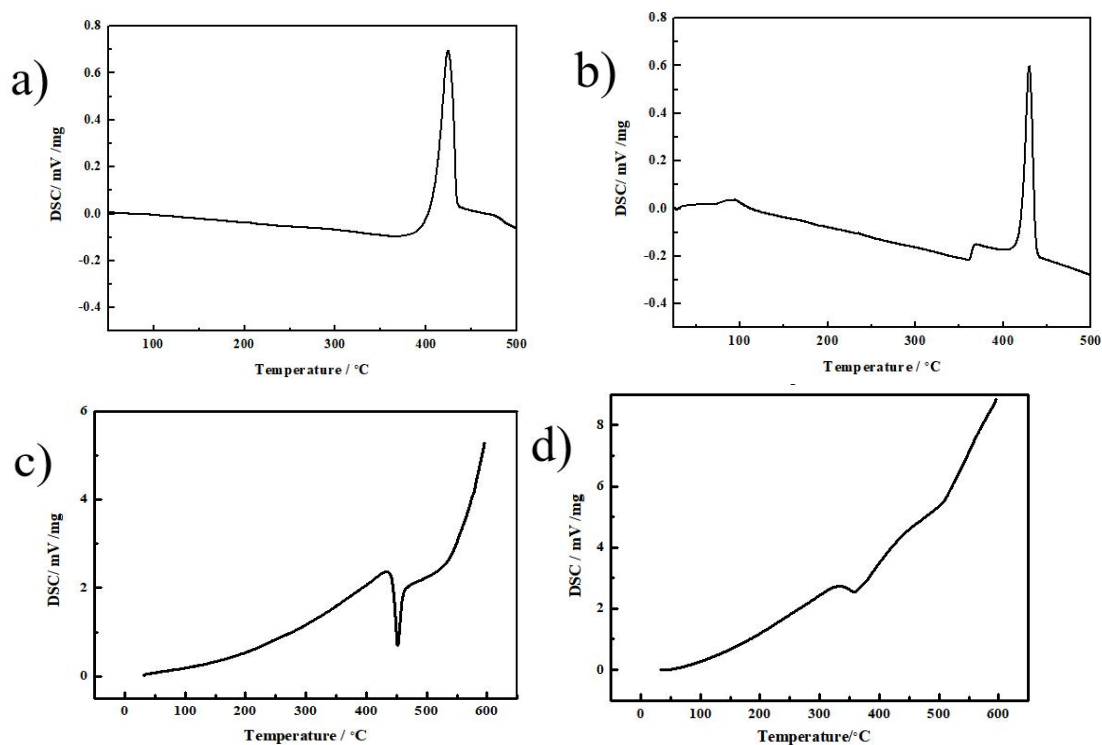

**Figure S4. Thermogravimetric And Differential Scanning Calorimeter Analyses (TG-DSC).1 -4 (a-d)**

**Table S1. Summary of Crystal Data for Compounds 1–4.**

|                          | 1                     | 2                     | 3                                                              | 4                                                              |
|--------------------------|-----------------------|-----------------------|----------------------------------------------------------------|----------------------------------------------------------------|
| Empirical formula        | CsHgAsSe <sub>3</sub> | CsCdAsSe <sub>3</sub> | Cs <sub>2</sub> Cd <sub>2</sub> As <sub>2</sub> S <sub>6</sub> | Cs <sub>2</sub> Hg <sub>2</sub> As <sub>2</sub> S <sub>6</sub> |
| Formula wt               | 645.3                 | 557.11                | 832.82                                                         | 1009.20                                                        |
| Cryst syst               | monoclinic            | monoclinic            | monoclinic                                                     | monoclinic                                                     |
| Space group              | P2(1)/n               | P2(1)/n               | P2(1)/n                                                        | P2(1)/n                                                        |
| <i>a</i> /Å              | 6.957(5)              | 10.428(6)             | 10.233(3)                                                      | 10.090(2)                                                      |
| <i>b</i> /Å              | 14.9717(11)           | 6.869(5)              | 6.631(2)                                                       | 6.6510(16)                                                     |
| <i>c</i> /Å              | 7.415(6)              | 10.794(7)             | 10.447(3)                                                      | 10.428(3)                                                      |
| $\alpha$ /deg            | 90                    | 90                    | 90                                                             | 90                                                             |
| $\beta$ /deg             | 96.926(13)            | 93.676(10)            | 95.300(5)                                                      | 94.686(4)                                                      |
| $\gamma$ /deg            | 90                    | 90                    | 90                                                             | 90                                                             |
| <i>V</i> /Å <sup>3</sup> | 763.9(10)             | 771.6(8)              | 705.9(4)                                                       | 697.5(3)                                                       |

|                                                                                                           |                |                |                |                |
|-----------------------------------------------------------------------------------------------------------|----------------|----------------|----------------|----------------|
| Z                                                                                                         | 4              | 4              | 2              | 2              |
| $D_v$ (Mg·m <sup>-3</sup> )                                                                               | 5.611          | 4.796          | 3.918          | 4.806          |
| $\mu$ /mm <sup>-1</sup>                                                                                   | 43.322         | 25.771         | 13.587         | 32.688         |
| $F(000)$                                                                                                  | 1080           | 952            | 736            | 864            |
| GOF                                                                                                       | 1.025          | 1.085          | 1.090          | 1.180          |
| $R1,^a wR2[I > 2\sigma(I)]$                                                                               | 0.0357, 0.0846 | 0.0758, 0.1663 | 0.0311, 0.0886 | 0.066, 0.1710  |
| $R1, wR2(all\ data)$                                                                                      | 0.0463, 0.0879 | 0.0854, 0.1695 | 0.0386, 0.0916 | 0.0719, 0.1725 |
| $aR1 = \Sigma   Fo  -  Fc  / \Sigma  Fo , wR2 = \Sigma [(w(Fo^2 - Fc^2)^2) / \Sigma [w(Fo^2)^2]]^{1/2}$ . |                |                |                |                |

**Table S2.** Selected bond lengths(Å) and angles(°) for compound CsHgAsSe<sub>3</sub>(1)

|                      |           |                       |           |
|----------------------|-----------|-----------------------|-----------|
| Hg(1)-Se(1)          | 2.571(2)  | As(1)-Se(3)           | 2.372(2)  |
| Hg(1)-Se(3)          | 2.581(19) | As(1)-Se(2)#2         | 2.386(2)  |
| Hg(1)-Se(2)          | 2.592(2)  | As(1)-Se(1)#3         | 2.404(2)  |
| Se(1)-Hg(1)-Se(3)    | 120.24(6) | Se(1)-Hg(1)-Se(2)     | 121.95(5) |
| Se(3)-Hg(1)-Se(2)    | 117.41(6) | Se(3)-As(1)-Se(2)#2   | 101.20(7) |
| Se(3)-As(1)-Se(1)#3  | 97.94(7)  | Se(2)#2-As(1)-Se(1)#3 | 102.77(8) |
| As(1)#11-Se(1)-Hg(1) | 91.87(7)  | As(1)#2-Se(2)-Hg(1)   | 93.31(7)  |
| As(1)-Se(3)-Hg(1)    | 90.48(8)  |                       |           |

Symmetry transformations used to generate equivalent atoms: #2 -x+1,-y,-z; #3 x-1,y,z; #11 x+1,y,z

**Table S3.** Selected bond lengths(Å) and angles(°) for compound CsCdAsSe<sub>3</sub>(2)

|             |          |               |          |
|-------------|----------|---------------|----------|
| Cd(1)-Se(1) | 2.541(3) | As(1)-Se(2)#8 | 2.357(4) |
| Cd(1)-Se(2) | 2.616(3) | As(1)-Se(3)   | 2.406(4) |

|                          |            |                       |            |
|--------------------------|------------|-----------------------|------------|
| Cd(1)-S(2) <sup>ii</sup> | 2.6696(15) | Se(3)-Cd(1)#2         | 2.719(4)   |
| Cd(1)-Se(3)              | 2.621(4)   | Se(2)-As(1)#9         | 2.357(4)   |
| As(1)-Se(1)#7            | 2.351(4)   | As(1)#7-Se(1)-Cd(1)   | 95.55(12)  |
| Se(1)-Cd(1)-Se(2)        | 118.18(11) | Se(1)-Cd(1)-Se(3)     | 122.96(12) |
| Se(2)-Cd(1)-Se(3)        | 103.27(11) | Se(3)-Cd(1)-Se(3)#1   | 109.52(9)  |
| Se(2)-Cd(1)-Se(3)#1      | 106.98(11) | Se(1)#7-As(1)-Se(2)#8 | 102.00(14) |
| Se(1)#7-As(1)-Se(3)      | 100.51(14) | Se(2)#8-As(1)-Se(3)   | 98.58(14)  |
| As(1)-Se(3)-Cd(1)        | 97.14(12)  | As(1)-Se(3)-Cd(1)#2   | 102.33(12) |
| Cd(1)-Se(3)-Cd(1)#2      | 115.22(11) | As(1)#9-Se(2)-Cd(1)   | 88.34(12)  |

Symmetry transformations used to generate equivalent atoms: #1  $-x+1/2, y+1/2, -z+3/2$ ; #2  $-x+1/2, y-1/2, -z+3/2$ ; #7  $-x, -y, -z+1$ ; #8  $x, y-1, z$ ; #9  $x, y+1, z$

**Table S4** Selected bond lengths (Å) and angles (°) for compound Cs<sub>2</sub>Cd<sub>2</sub>As<sub>2</sub>S<sub>6</sub> (**3**)

|                 |           |                       |           |
|-----------------|-----------|-----------------------|-----------|
| Cd(1)-S(1)      | 2.501(2)  | S(2)-Cd(1)-S(3)       | 103.01(7) |
| Cd(1)-S(2)      | 2.519(2)  | S(1)-Cd(1)-S(3)#1     | 96.97(7)  |
| Cd(1)-S(3)      | 2.521(2)  | S(2)-Cd(1)-S(3)#1     | 105.16(7) |
| Cd(1)-S(3)#1    | 2.616(2)  | S(3)-Cd(1)-S(3)#1     | 111.04(5) |
| As(1)-S(1)      | 2.215(2)  | S(1)-As(1)-S(2)#9     | 103.12(9) |
| As(1)-S(2)#9    | 2.218(2)  | S(1)-As(1)-S(3)#4     | 100.25(9) |
| As(1)-S(3)#4    | 2.278(2)  | S(2)#9-As(1)-S(3)#4   | 98.94(9)  |
| S(3)-As(1)#4    | 2.278(2)  | As(1)-S(1)-Cd(1)      | 96.86(8)  |
| S(2)-As(1)#9    | 2.218(2)  | As(1)#4-S(3)-Cd(1)    | 97.89(8)  |
| S(3)-Cd(1)#12   | 2.616(2)  | As(1)#4-S(3)-Cd(1)#12 | 100.80(8) |
| S(1)-Cd(1)-S(2) | 118.21(7) | Cd(1)-S(3)-Cd(1)#12   | 114.33(8) |

|                 |           |                    |          |
|-----------------|-----------|--------------------|----------|
| S(1)-Cd(1)-S(3) | 121.36(8) | As(1)#9-S(2)-Cd(1) | 90.32(8) |
|-----------------|-----------|--------------------|----------|

Symmetry transformations used to generate equivalent atoms: #1  $-x+1/2, y+1/2, -z+3/2$ ;  
#2  $-x, -y, -z+2$ ; #3  $x+1/2, -y-1/2, z-1/2$ ; #4  $-x+1, -y, -z+2$ ; #5  $x, y-1, z$ ; #6  
 $-x+1/2, y-1/2, -z+5/2$ ; #7  $x-1/2, -y-1/2, z+1/2$ ; #8  $x-1/2, -y+1/2, z+1/2$ ; #9  $-x+1, -y+1, -z+2$ ;  
#10  $-x+1/2, y+1/2, -z+5/2$ ; #11  $x+1/2, -y+1/2, z-1/2$ ; #12  $-x+1/2, y-1/2, -z+3/2$ ; #13  $x, y+1, z$

**Table S5** Selected bond lengths (Å) and angles (°) for compound Cs<sub>2</sub>Hg<sub>2</sub>As<sub>2</sub>S<sub>6</sub> (4)

|                 |          |                     |            |
|-----------------|----------|---------------------|------------|
| Hg(1)-S(2)      | 2.482(7) | S(3)-Hg(1)-S(1)     | 104.1(2)   |
| Hg(1)-S(3)      | 2.485(6) | S(2)-Hg(1)-S(3)#1   | 91.4(2)    |
| Hg(1)-S(1)      | 2.529(6) | S(3)-Hg(1)-S(3)#1   | 109.17(13) |
| Hg(1)-S(3)#1    | 2.749(6) | S(1)-Hg(1)-S(3)#1   | 102.1(2)   |
| As(1)-S(1)#7    | 2.212(7) | S(1)#7-As(1)-S(2)#4 | 102.7(3)   |
| As(1)-S(2)#4    | 2.236(7) | S(1)#7-As(1)-S(3)   | 98.6(3)    |
| As(1)-S(3)      | 2.278(7) | S(2)#4-As(1)-S(3)   | 100.6(3)   |
| S(1)-As(1)#9    | 2.212(7) | As(1)#9-S(1)-Hg(1)  | 91.8(2)    |
| S(2)-As(1)#4    | 2.236(7) | As(1)#4-S(2)-Hg(1)  | 96.1(3)    |
| S(3)-Hg(1)#5    | 2.749(6) | As(1)-S(3)-Hg(1)    | 96.6(2)    |
| S(2)-Hg(1)-S(3) | 128.5(2) | As(1)-S(3)-Hg(1)#5  | 101.0(2)   |
| S(2)-Hg(1)-S(1) | 117.4(2) | Hg(1)-S(3)-Hg(1)#5  | 115.8(2)   |

Symmetry transformations used to generate equivalent atoms: #1  $-x+1/2, y+1/2, -z+1/2$ ;  
#2  $-x-1/2, y-1/2, -z+1/2$ ; #3  $x-1/2, -y+1/2, z+1/2$ ; #4  $-x, -y, -z$ ; #5  $-x+1/2, y-1/2, -z+1/2$ ; #6  
 $x-1/2, -y-1/2, z+1/2$ ; #7  $x, y-1, z$ ; #8  $x+1/2, -y-1/2, z-1/2$ ; #9  $x, y+1, z$ ; #10  
 $x+1/2, -y+1/2, z-1/2$ ; #11  $-x-1/2, y+1/2, -z+1/2$
